# Supplementary material for: Gentamicin Induces Laminin 332 and Improves Wound Healing in Junctional Epidermolysis Bullosa Patients with Nonsense Mutations
Source: PubMed Central journal article supplement — Mol Ther. 2020 Mar 17;28(5):1327–38. doi: 10.1016/j.ymthe.2020.03.006 (PMC7210719; doi:10.1016/j.ymthe.2020.03.006), 2020-03-17
Supplement: mmc1.pdf [file mmc1.pdf]

YMTHE, Volume 28

## **Supplemental Information**

**Gentamicin Induces Laminin 332 and Improves**

**Wound Healing in Junctional Epidermolysis**

**Bullosa Patients with Nonsense Mutations**

**Andrew Kwong, Jon Cogan, Yingping Hou, Richard Antaya, Michelle Hao, Gene Kim, Vadim Lincoln, Qiuyang Chen, David T. Woodley, and Mei Chen**

# Supplemental Figure S1

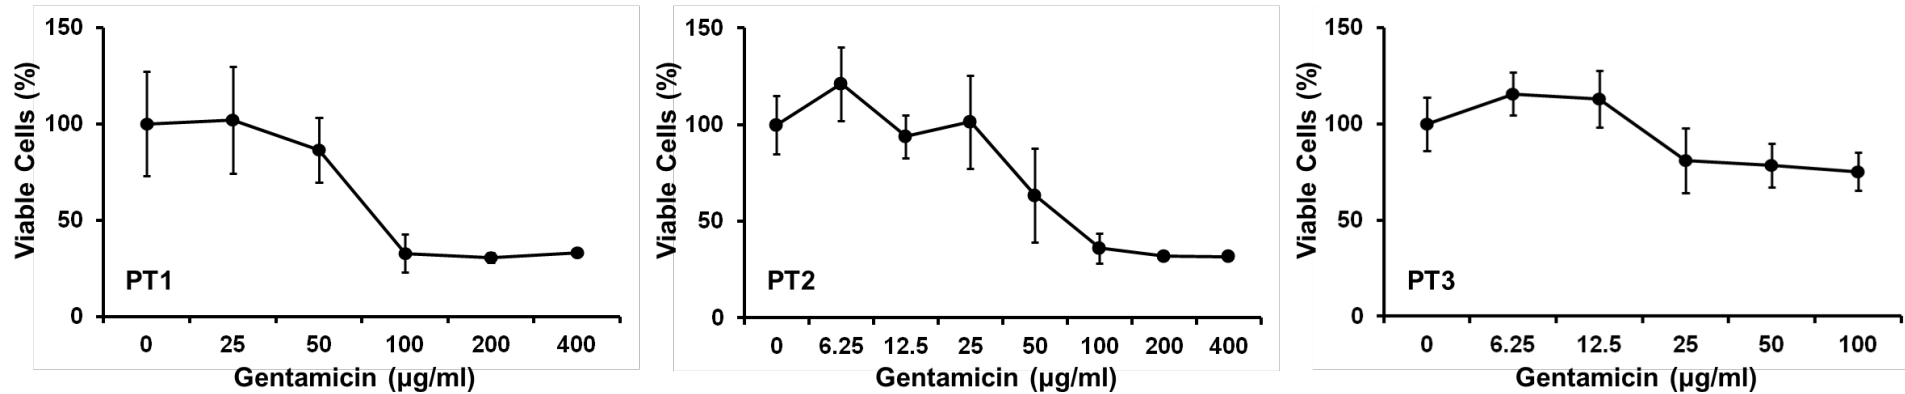

**Fig. S1. Viability Assay (XTT) of GS-JEB cells treated with gentamicin.**

The primary GS-JEB keratinocytes isolated from PT1-PT3 were seeded onto 96 well plates in quadruplicate at a density of 10,000 cells per well. At 24 hours after seeding, fresh medium was added containing gentamicin (0 to 400 µg/ml) for PT1 and PT2 and (0 to 100 µg/ml) for PT3. At 48 hours after treatment, XTT solution was added to each well. After 4 hours of incubation at 37°C, plates were read at a 450 nm wavelength. Data represent the mean  $\pm$  SD of quadruplicate determinations in one representative experiment. Similar results were obtained in two other independent experiments.

## Supplementary Table I

| <b>PT ID</b> | <b>Genotype</b>      | <b>5' (-3 to -1)</b> | <b>Nonsense Mutation</b> | <b>3' (+4 to +6)</b> |
|--------------|----------------------|----------------------|--------------------------|----------------------|
| PT1          | c.975T>A<br>(C325X)  | ACA                  | UGA                      | CAC                  |
| PT2          | c.189C>A<br>(Y63X)   | GGA                  | UAA                      | TAT                  |
| PT3          | c.1873C>T<br>(Q625X) | ACA                  | UAA                      | AAG                  |

**Supplementary Table 1: Type and immediate nucleotides surrounding the nonsense mutations in three patients.**
